# Supplementary material for: Phase Angle, Handgrip Strength, and Other Indicators of Nutritional Status in Cancer Patients Undergoing Different Nutritional Strategies: A Systematic Review and Meta-Analysis
Source: MDPI journal article supplement (doi:10.3390/nu15071790), 2023-04-06
Supplement: s1 [file s1]

**Table S1.** Excluded studies and reasons for exclusion.

|                                                                                                                                                                                                                                                                                                                                                                                                                                                                                                                                                                                                                        |
|------------------------------------------------------------------------------------------------------------------------------------------------------------------------------------------------------------------------------------------------------------------------------------------------------------------------------------------------------------------------------------------------------------------------------------------------------------------------------------------------------------------------------------------------------------------------------------------------------------------------|
| Caccialanza, R., Cereda, E., Caraccia, M., Klersy, C., Nardi, M., Cappello, S., Borioli, V., Turri, A., Imarisio, I., Lasagna, A., Saddi, J., Arcaini, L., Benazzo, M., Stragliotto, S., Zagonel, V., & Pedrazzoli, P. (2019). Early 7-day supplemental parenteral nutrition improves body composition and muscle strength in hypophagic cancer patients at nutritional risk. <i>Supportive Care in Cancer: Official Journal of the Multinational Association of Supportive Care in Cancer</i> , 27(7), 2497–2506. <a href="https://doi.org/10.1007/s00520-018-4527-0">https://doi.org/10.1007/s00520-018-4527-0</a> . |
| Reason for exclusion: No control group.                                                                                                                                                                                                                                                                                                                                                                                                                                                                                                                                                                                |
| Capello, S., Cereda, E., Colombo, S., Klersy, C., & Imarisio, I. (n.d.). Counseling with or without systematic use of oral supplements in head-neck cancer patients undergoing radiotherapy. Retrieved March 18, 2023, from <a href="https://www.proquest.com/docview/2061436196">https://www.proquest.com/docview/2061436196</a>                                                                                                                                                                                                                                                                                      |
| Reason for exclusion: Abstract.                                                                                                                                                                                                                                                                                                                                                                                                                                                                                                                                                                                        |
| Cornejo-Pareja, I., Ramirez, M., Camprubi-Robles, M., Rueda, R., Vegas-Aguilar, I. M., & Garcia-Almeida, J. M. (2021). Effect on an Oral Nutritional Supplement with $\beta$ -Hydroxy- $\beta$ -methylbutyrate and Vitamin D on Morphofunctional Aspects, Body Composition, and Phase Angle in Malnourished Patients. <i>Nutrients</i> , 13(12), 4355. <a href="https://doi.org/10.3390/nu13124355">https://doi.org/10.3390/nu13124355</a>                                                                                                                                                                             |
| Reason for exclusion: No cancer patients.                                                                                                                                                                                                                                                                                                                                                                                                                                                                                                                                                                              |
| Della Valle, S., Colatruglio, S., La Vela, V., Tagliabue, E., Mariani, L., & Gavazzi, C. (2018). Nutritional intervention in head and neck cancer patients during chemo-radiotherapy. <i>NUTRITION</i> , 51–52, 95–97. <a href="https://doi.org/10.1016/j.nut.2017.12.012">https://doi.org/10.1016/j.nut.2017.12.012</a> .                                                                                                                                                                                                                                                                                             |
| Reason for exclusion: No control group.                                                                                                                                                                                                                                                                                                                                                                                                                                                                                                                                                                                |
| Di Renzo, L., Marchetti, M., Cioccoloni, G., Gratteri, S., Capria, G., Romano, L., Soldati, L., Mele, M. C., Merra, G., Cintoni, M., & De Lorenzo, A. (2019). Role of phase angle in the evaluation of effect of an immuno-enhanced formula in post-surgical cancer patients: A randomized clinical trial. <i>EUROPEAN REVIEW FOR MEDICAL AND PHARMACOLOGICAL SCIENCES</i> , 23(3), 1322–1334.                                                                                                                                                                                                                         |
| Reason for exclusion: No control group.                                                                                                                                                                                                                                                                                                                                                                                                                                                                                                                                                                                |
| Finger, A. (2021). 917P - Head and neck cancer patients under (chemo-)radiotherapy undergoing nutritional intervention: Results from the prospective randomized HEADNUT-trial.                                                                                                                                                                                                                                                                                                                                                                                                                                         |
| Reason for exclusion: Poster                                                                                                                                                                                                                                                                                                                                                                                                                                                                                                                                                                                           |
| Kutz, L. M., Abel, J., Schweizer, D., Tribius, S., Krüll, A., Petersen, C., & Löser, A. (2022). Quality of life, HPV-status and phase angle predict survival in head and neck cancer patients under (chemo)radiotherapy undergoing nutritional intervention: Results from the prospective randomized HEADNUT-trial. <i>Radiotherapy and Oncology: Journal of the European Society for Therapeutic Radiology and Oncology</i> , 166, 145–153. <a href="https://doi.org/10.1016/j.radonc.2021.11.011">https://doi.org/10.1016/j.radonc.2021.11.011</a>                                                                   |
| Reason for exclusion: Not valid data                                                                                                                                                                                                                                                                                                                                                                                                                                                                                                                                                                                   |
| Löser, A., Abel, J., Kutz, L. M., Krause, L., Finger, A., Greinert, F., Sommer, M., Lorenz, T., Culmann, E., von Grundherr, J., & al., et. (2021). Head and neck cancer patients under (chemo-) radiotherapy undergoing nutritional intervention: Results from the prospective randomized HEADNUT-trial. <i>Radiotherapy and Oncology</i> , 159 CC-, 82-90. <a href="https://doi.org/10.1016/j.radonc.2021.03.019">https://doi.org/10.1016/j.radonc.2021.03.019</a>                                                                                                                                                    |

|                                                                                                                                                                                                                                                                                                                                                                             |
|-----------------------------------------------------------------------------------------------------------------------------------------------------------------------------------------------------------------------------------------------------------------------------------------------------------------------------------------------------------------------------|
| Reason for exclusion: No valid data.                                                                                                                                                                                                                                                                                                                                        |
|                                                                                                                                                                                                                                                                                                                                                                             |
| Orell, H., Schwab, U., Saarilahti, K., Österlund, P., Ravasco, P., & Mäkitie, A. (2019). Nutritional Counseling for Head and Neck Cancer Patients Undergoing (Chemo) Radiotherapy-A Prospective Randomized Trial. <i>Frontiers in Nutrition</i> , 6, 22.<br><a href="https://doi.org/10.3389/fnut.2019.00022">https://doi.org/10.3389/fnut.2019.00022</a>                   |
| Reason for exclusion: No control group.                                                                                                                                                                                                                                                                                                                                     |
|                                                                                                                                                                                                                                                                                                                                                                             |
| Tumas, J., Tumiene, B., Jurkeviciene, J., Jasiunas, E., & Sileikis, A. (2020). Nutritional and immune impairments and their effects on outcomes in early pancreatic cancer patients undergoing pancreatoduodenectomy. <i>Clinical Nutrition</i> , 39(11), 3385–3394.<br><a href="https://doi.org/10.1016/j.clnu.2020.02.029">https://doi.org/10.1016/j.clnu.2020.02.029</a> |
| Reason for exclusion: Not valid data.                                                                                                                                                                                                                                                                                                                                       |
