# Supplementary figures and images for: Phase Angle, Handgrip Strength, and Other Indicators of Nutritional Status in Cancer Patients Undergoing Different Nutritional Strategies: A Systematic Review and Meta-Analysis
Source: MDPI journal article supplement (doi:10.3390/nu15071790), 2023-04-06

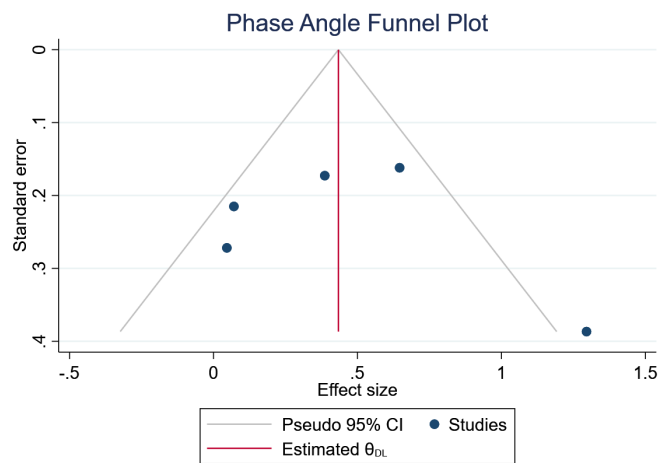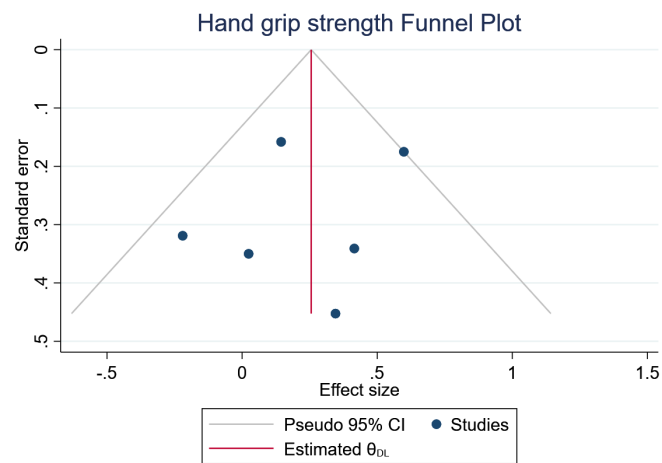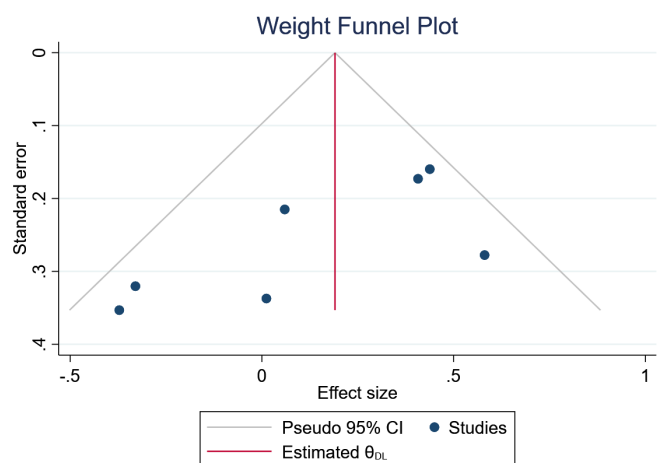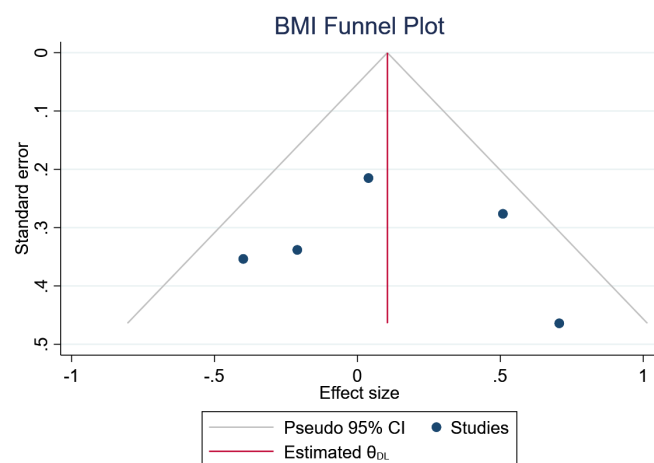

Figure S1: Funnel plot for phase angle, hand grip strength, weight and BMI.

Supplement: s1 [file s1]
